# Supplementary material for: Immune-neural regulatory mechanism of osteoporosis induced by androgen deficiency
Source: PeerJ journal article supplement (doi:10.7717/peerj.20737), 2026-02-18
Supplement: Literature_Search_Strategy.docx [file Literature_Search_Strategy.docx]

# Supplementary File 1:Detailed Literature Search Strategy

# Search Methodology

Databases searched: PubMed, Web of Science, Scopus

Date range:January 2000 May 2025

Language restriction: English only

Search execution period: December 24,2024 June 25,2025

Last search date: June 25, 2025

# Search Concepts and Terms

Concept 1: Androgen Signaling

Included keywords:androgen deficiency,testosterone, androgen receptor, hypogonadism, androgen deprivation, androgen suppression

Concept 2: Bone Metabolism

Included keywords:osteoporosis, osteoblast, osteoclast, RANKL, bone loss, bone remodeling, bone metabolism, bone homeostasis

Concept 3: Mechanistic Pathways

Included keywords:immune regulation,macrophage polarization, neuroskeletal axis, T cell, B cell, neutrophil, mast cell, immune cell

Concept 4: Signaling Systems

Included keywords: erythropoietin, erythropoietin receptor, EPO, EPOR, EPO/EPOR signaling, HPA axis, JAK2/STAT5, neuropeptide, CGRP, Semaphorin 3A(Sema3A)

# Complete Search Queries

PubMed Search Strategy:

The search strategy combined the following terms using Boolean operators:androgen deficiency OR testosterone OR androgen receptor OR hypogonadism OR androgen deprivation,AND osteoporosis OR osteoblast OR osteoclast OR RANKL OR bone loss OR bone remodeling,AND immune regulation OR macrophage polarization OR neuroskeletal OR T cell OR B cell OR immune cell,AND erythropoietin OR EPO OR EPOR OR HPA axis OR JAK2/STAT5 OR neuropeptide OR CGRP OR Semaphorin 3A OR Sema3A.Filters were applied to include only Englishlanguage articles published between January 1,2000,and May 31,2025.

Web of Science Search Strategy:

The search was conducted in the topic field using the following combination of terms:androgen deficiency OR testosterone OR androgen receptor OR hypogonadism OR androgen deprivation,AND osteoporosis OR osteoblast OR osteoclast OR RANKL OR bone loss OR bone remodeling,AND immune regulation OR macrophage polarization OR neuroskeletal OR T cell OR B cell OR immune cell,AND erythropoietin OR EPO OR EPOR OR HPA axis OR JAK2/STAT5 OR neuropeptide OR CGRP OR Semaphorin 3A OR Sema3A.Results were refined by language(English)and publication years(20002025).

Scopus Search Strategy:

The search was performed in the titleabstractkeyword fields using the following term combination:androgen deficiency OR testosterone OR androgen receptor OR hypogonadism OR androgen deprivation,AND osteoporosis OR osteoblast OR osteoclast OR RANKL OR bone loss OR bone remodeling,AND immune regulation OR macrophage polarization OR neuroskeletal OR T cell OR B cell OR immune cell,AND erythropoietin OR EPO OR EPOR OR HPA axis OR JAK2/STAT5 OR neuropeptide OR CGRP OR Semaphorin 3A OR Sema3A.Search results were limited to Englishlanguage publications from the years 2000 through 2025.

# Screening and Selection Process

1.Initial screening: Titles and abstracts were screened against inclusion criteria

2.Fulltext review: Potentially eligible studies underwent fulltext assessment

3.Manual reference screening: Reference lists of included studies were examined for additional relevant publications

4.Data extraction: Relevant data were extracted using standardized forms

# Results of Search

Initial records identified: 1,850

Records after duplicates removed: 1,250

Full-text articles assessed for eligibility: 210

Studies included in qualitative synthesis: 108
